# Supplementary material
Source: publisher figshare collection journal article supplement (https://karger.figshare.com/ndownloader/files/24154853)
Supplement: Supplementary file 1 [file 24154853]

**Appendix Fig.** **S1.** Decision curve analysis of the predictive models of stress urinary incontinence postpartum for primiparous (A) and multiparous (B).
